# Supplementary material for: Enzyme-activatable charge transfer in gold nanoclusters
Source: Royal Society of Chemistry journal article supplement (doi:10.1039/d4sc01509f), 2024-01-01
Supplement: d4sc01509f1.pdf [file d4sc01509f1.pdf]

## Supporting Information

### Enzyme-activatable charge transfer in gold nanoclusters

Hao-Hua Deng<sup>1</sup>, Kai-Yuan Huang<sup>1</sup>, Yu Zhong<sup>1</sup>, Ye Li<sup>1</sup>, Hong-Xiang Huang<sup>1</sup>, Xiang-Yu Fang<sup>1</sup>, Wei-Ming Sun<sup>1\*</sup>, Qiaofeng Yao<sup>2</sup>, Wei Chen<sup>1\*</sup> & Jianping Xie<sup>3\*</sup>

<sup>1</sup> Higher Educational Key Laboratory for Nano Biomedical Technology of Fujian Province, Department of Pharmaceutical Analysis, Fujian Medical University, Fuzhou 350004, China.

<sup>2</sup> Tianjin Key Laboratory of Molecular Optoelectronic Sciences, Key Laboratory of Organic Integrated Circuits, Ministry of Education, Department of Chemistry, School of Science, Tianjin University, Tianjin 300072, China.

<sup>3</sup> Department of Chemical and Biomolecular Engineering, National University of Singapore, 4 Engineering Drive 4, Singapore 117585, Singapore.

These authors contributed equally: Hao-Hua Deng and Kai-Yuan Huang.

\*Corresponding email: sunwm@fjmu.edu.cn (W.M. Sun); weichen@fjmu.edu.cn (W. Chen); chexiej@nus.edu.sg (J. Xie)

## Supplementary Methods

**TA Measurement.** The fs-TA measurements were performed on a Helios pump-probe system (Ultrafast Systems LLC) combined with an amplified femtosecond laser system (Coherent). Optical parametric amplifier (TOPAS-800-fs) provided a 350 nm pump pulse ( $\sim 0.2 \mu\text{J}/\text{pulse}$ ), which was excited by a Ti: sapphire regenerative amplifier (Legend Elite-1K-HE; 800 nm), 35 fs, 7 mJ/pulse, 1 kHz) and seeded with a mode-locked Ti: sapphire laser system (Micra 5) and an Nd: YLF laser (Evolution 30) pumped. Focusing the 800 nm beams (split from the regenerative amplifier with a tiny portion,  $\sim 400 \text{ nJ}/\text{pulse}$ ) onto a  $\text{CaF}_2$  plate produced the white-light continuum (WLC) probe pulses (350-650nm). The pulse-to-pulse fluctuation of the WLC is corrected by a reference beam split from WLC. A motorized optical delay line was used to change the time delays (0-8 ns) between the pump and probe pulses. The instrument response function (IRF) was determined to be  $\sim 100 \text{ fs}$  by a routine cross-correlation procedure. The instrument response function (IRF) was determined to be  $\sim 100 \text{ fs}$  by a routine cross-correlation procedure. A mechanical chopper operated at a frequency of 500 Hz used to modulate the pump pulses such that the fs-TA spectra with and without the pump pulses can be recorded alternately.

**DFT Calculations.** All the geometries of MPR-AuNCs and MP-AuNCs were optimized without any constraints by using the M06-2X method in conjunction with 6-31G(d)&Def2-TZVP basis set.<sup>1</sup> Herein, the solvation model based on density (SMD) was used to take the effect of solvent (water) into account.<sup>2</sup> Vibrational frequency calculations have been performed for each optimized structure at the same level to ensure these structures without imaginary frequencies. And the isomers were ordered according to the zero-point energy (ZPE)-corrected electronic energies. Additionally, the natural population analysis (NPA) and electron density difference (EDD) were obtained at higher 6-31+g(d, p)&Def2-TZVP level.<sup>3</sup> All the above calculations were performed by using the Gaussian 09 program package.<sup>4</sup> Dimensional plots of molecular structures and molecular orbitals were generated with the GaussView program,<sup>5</sup> while EDD diagram was plotted by employing the Multiwfn software.<sup>6</sup>

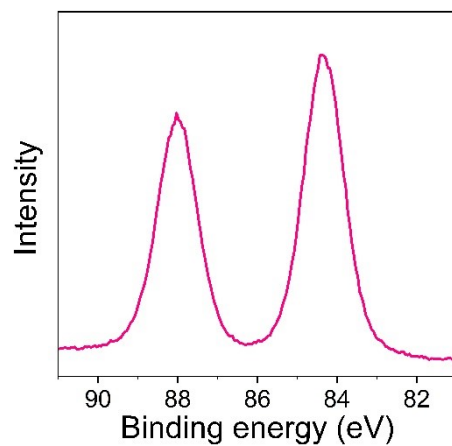

**Fig. S1** | High resolution Au(4f) spectrum of MPR-AuNCs.

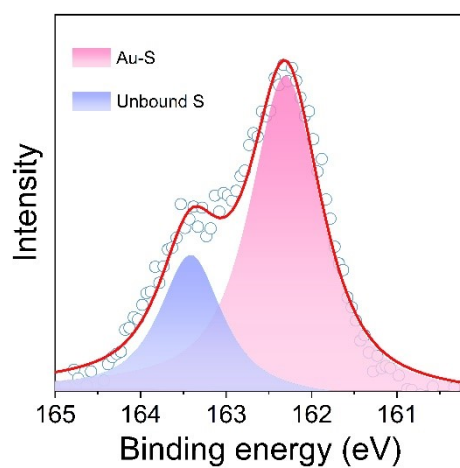

**Fig. S2** | High resolution S(2p) spectrum of MPR-AuNCs.

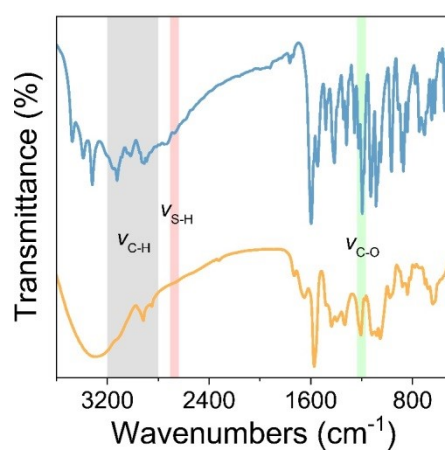

**Fig. S3** | FTIR spectra of MPR (blue line) and MPR-AuNCs (orange line).

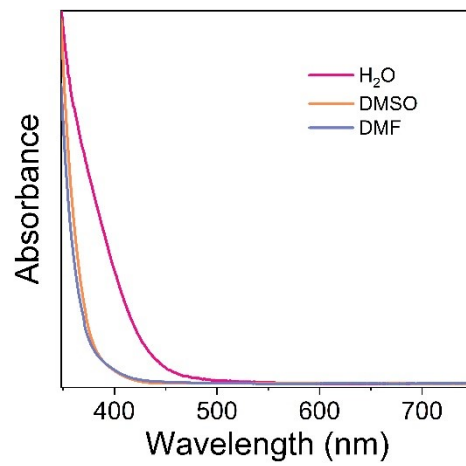

**Fig. S4** | Comparison of the absorption spectra of MPR-AuNCs in water, DMSO, and DMF.

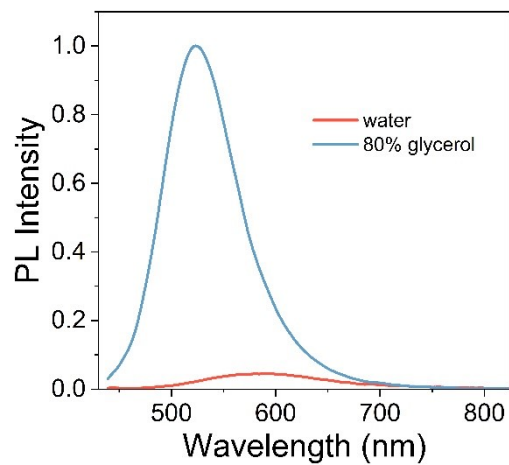

**Fig. S5** | The emission spectra of MPR-AuNCs in water and 80% glycerol with the same absorbance at 420 nm (0.08).

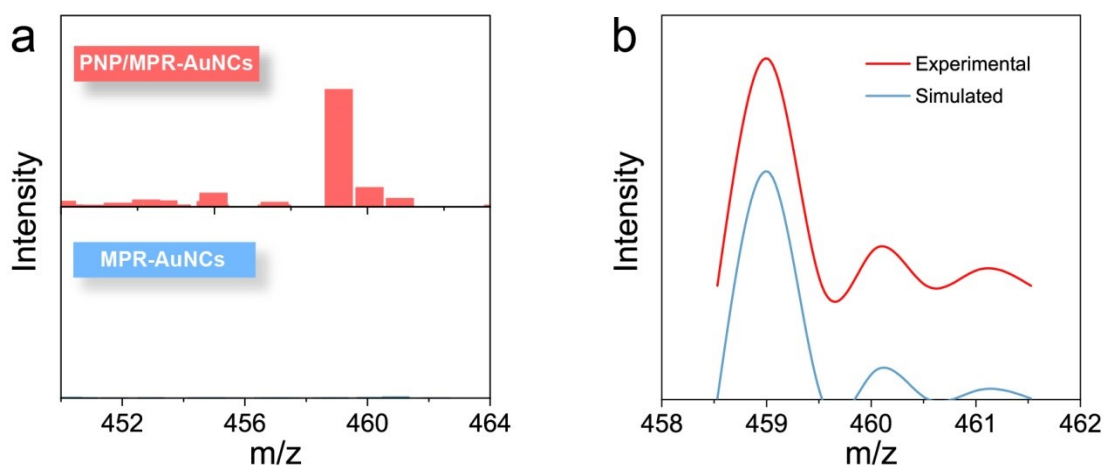

**Fig. S6 | Observation of ribose-1-phosphate (RP) after PNP-catalyzed reaction.** (a) ESI-MS spectra of MPR-AuNCs before and after the addition of PNP (50 U/L). (b) The experimental (red line) and simulated (blue line) isotope patterns of RP ( $[2\text{RP-H}]^-$ ).

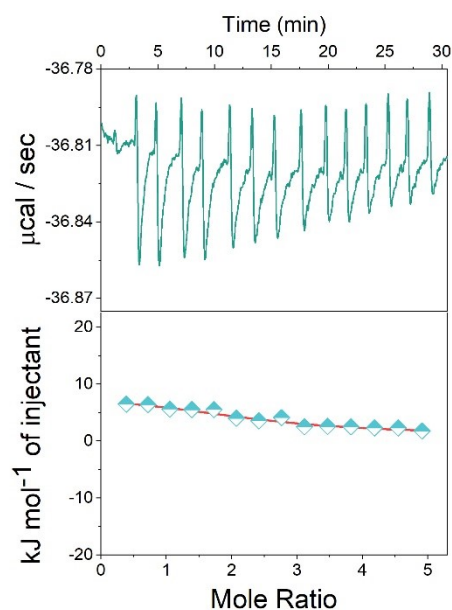

**Fig. S7 | Typical data obtained from isothermal titration calorimetry (ITC) measurements of MPR titrated with PNP.** Top: Corrected heat rate of the titration. Bottom: Integrated normalized heats from each titration step corrected by the heats of dilution (filled rhombus) together with a fit corresponding to an independent binding model (straight line).

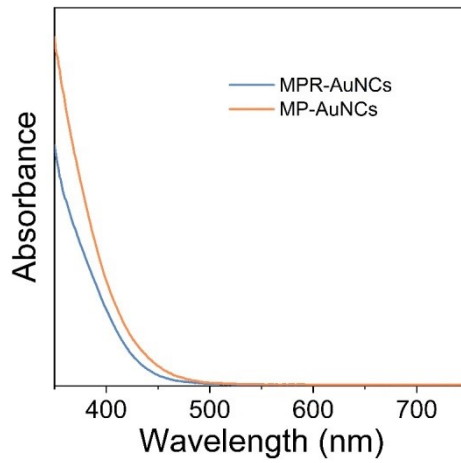

**Fig. S8** | Absorption spectra of MPR-AuNCs and MP-AuNCs.

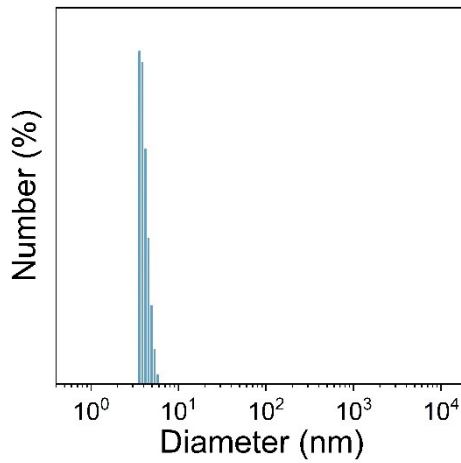

**Fig. S9** | DLS measurement of MP-AuNCs.

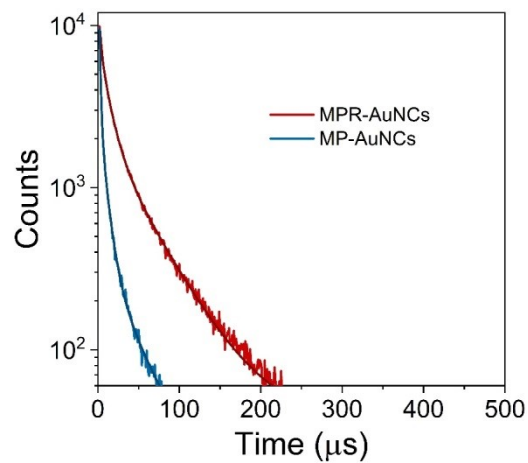

**Fig. S10** | PL lifetime measurements of MPR-AuNCs and MP-AuNCs.

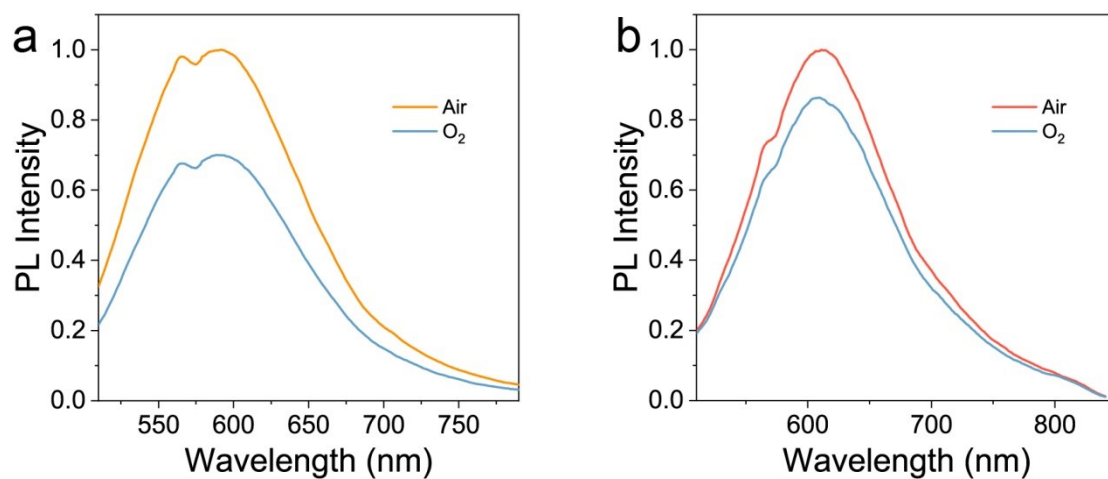

**Fig. S11 | O<sub>2</sub> quenching experiments.** Emission spectra of (a) MPR-AuNCs and (b) MP-AuNCs under air and pure O<sub>2</sub>, respectively.

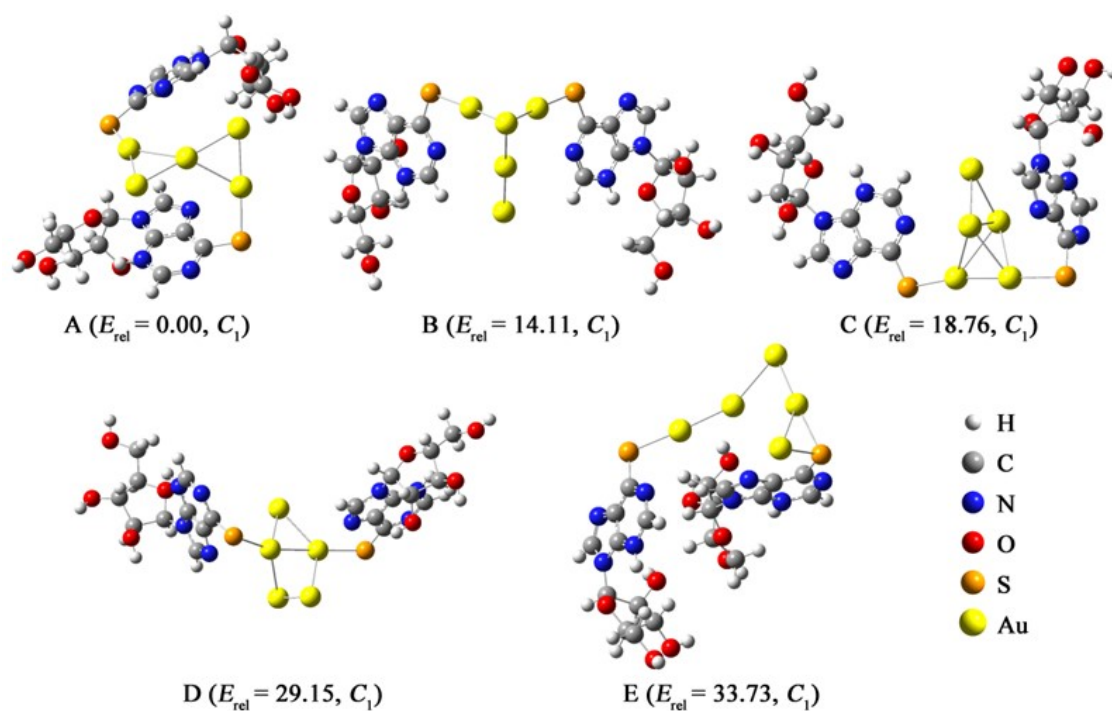

**Fig. S12 | Low-lying A-E isomers of MPR-AuNC, and the relative energy ( $E_{\text{rel}}$ , in kcal/mol) and geometric symmetry are given in the parentheses.**

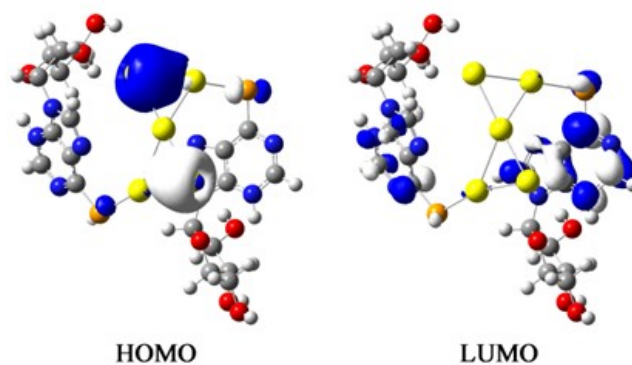

**Fig. S13** | The HOMO and LUMO orbitals of the most stable MPR-AuNC with isovalue of 0.04 a.u.

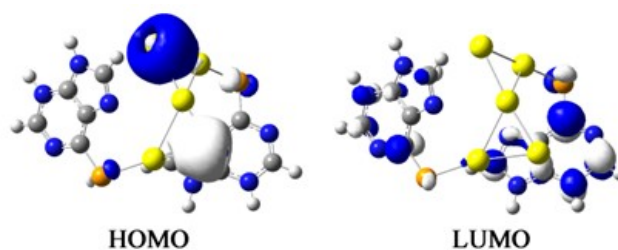

**Fig. S14** | The HOMO and LUMO orbitals of the most stable MP-AuNC with isovalue of 0.04 a. u.

**Table S1** | The NPA charges on the Au<sub>5</sub> moiety in the global minima of MPR-AuNC and MP-AuNC at the ground and excited state ( $Q_{GS}$  and  $Q_{ES}$ , in |e|), and the charge transfer from Au<sub>5</sub> core to the surrounding ligands ( $\Delta Q$ ,  $\Delta Q = Q_{ES} - Q_{GS}$ , in |e|) during the light-excited process.

| Complex  | $Q_{GS}$ | $Q_{ES}$ | $\Delta Q$ |
|----------|----------|----------|------------|
| MPR-AuNC | 0.227    | 0.317    | 0.091      |
| MP-AuNC  | 0.288    | 0.984    | 0.696      |



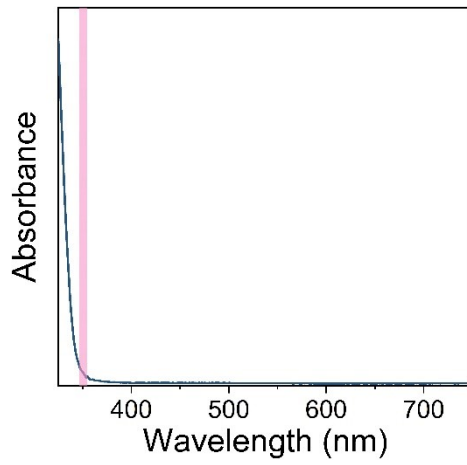

**Fig. S15** | Absorption spectrum of MPR.

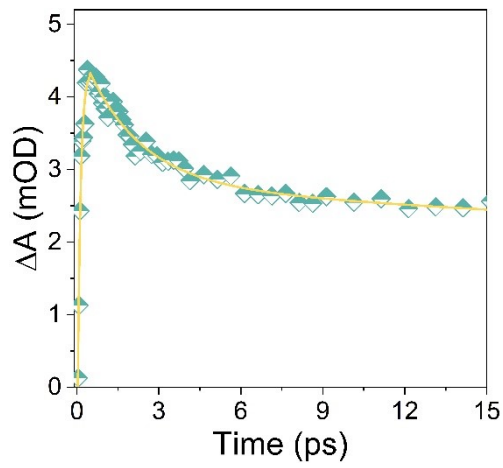

**Fig. S16** | Kinetics trace of MPR-AuNCs monitored at 460 nm.

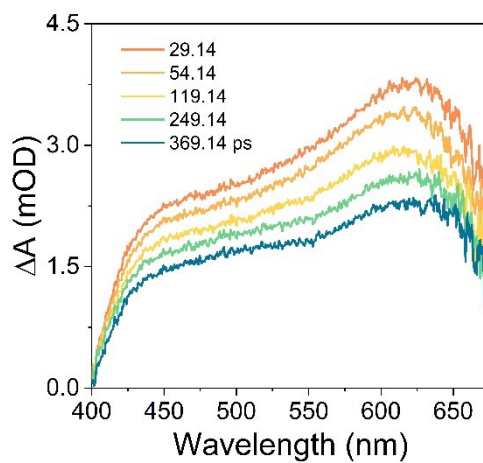

**Fig. S17** | Long-time evolution of TA spectra of MPR-AuNCs.

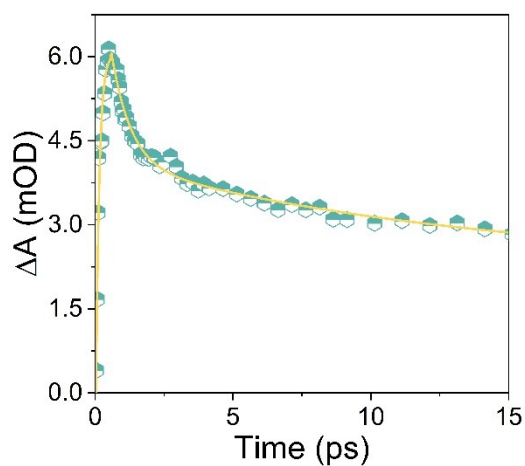

**Fig. S18** | Kinetics trace of MP-AuNCs recorded at 460 nm.

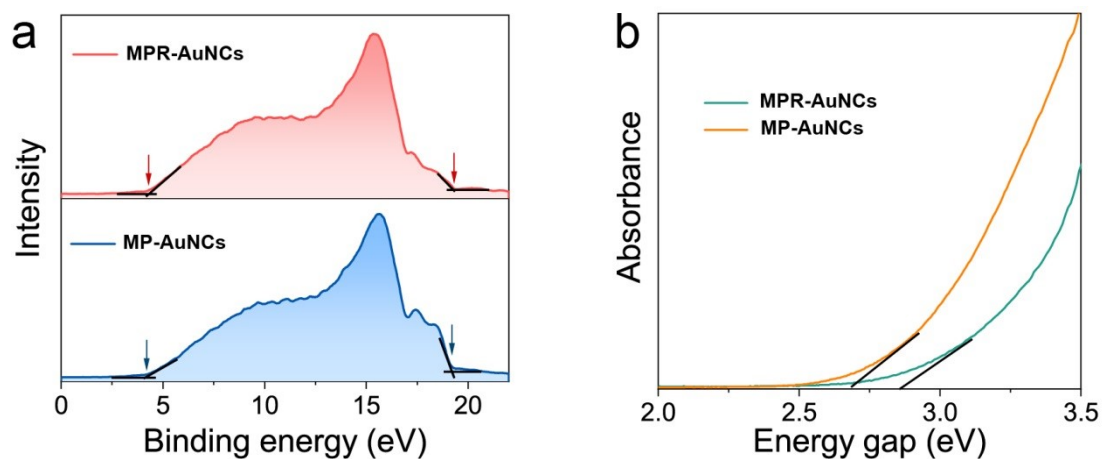

**Fig. S19** | **Determination of HOMO-LUMO energy levels of MPR-AuNCs and MP-AuNCs.** (a) Ultraviolet photoelectron spectra of MPR-AuNCs and MP-AuNCs. (b) Optical energy gaps of MPR-AuNCs and MP-AuNCs.

**Table S2** | The energy levels of ground state ( $E_{S_0}$ ) and charge-transfer singlet state ( $E_{1_{CT}}$ )

| Sample    | $E_{\text{cut-off}}$ (eV) | $E_{\text{onset}}$ (eV) | $E_g$ (eV) | $E_{S_0}$ (eV) <sup>a</sup> | $E_{1_{CT}}$ (eV) <sup>b</sup> |
|-----------|---------------------------|-------------------------|------------|-----------------------------|--------------------------------|
| MPR-AuNCs | 19.31                     | 4.31                    | 2.87       | -6.22                       | -3.35                          |
| MP-AuNCs  | 19.18                     | 4.16                    | 2.67       | -6.20                       | -3.53                          |

$$^a E_{S_0} = -(21.22 - E_{\text{cut-off}} + E_{\text{onset}})$$

$$^b E_{1_{CT}} = E_{S_0} + E_{\text{onset}}$$

$E_{\text{cut-off}}$ : cut-off binding energy;  $E_{\text{onset}}$ : onset binding energy;  $E_g$ : optical energy gap

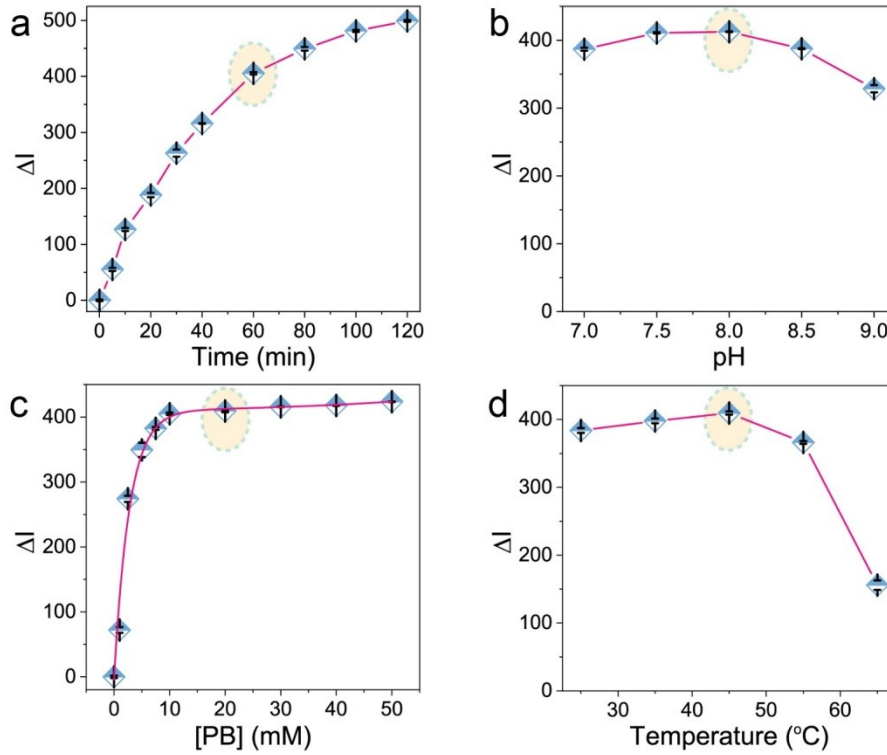

**Fig. S20** | **Optimization of the operating conditions for PNP sensing.**  $\Delta I$  as functions of (a) incubation time, (b) incubation pH, (c) concentration of phosphate buffer, and (d) incubation temperature. The activity of PNP was set at 25 U/L.

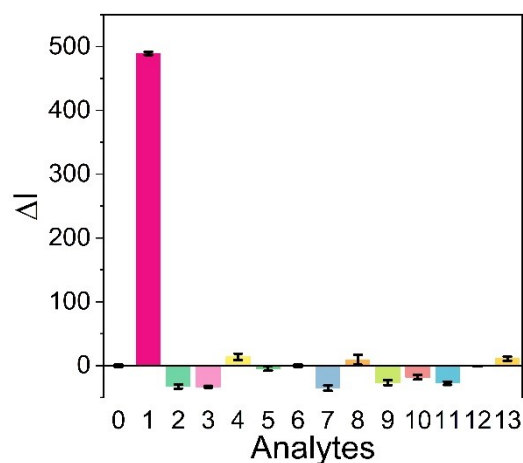

**Fig. S21** | Selectivity of the proposed approach for PNP activity determination. Samples marked 0–13 correspond to blank, PNP (25 U/L), BSA (1 mg/mL), trypsin (1 mg/mL), alkaline phosphatase (1000 U/L),  $\alpha$ -glucosidase (1000 U/L),  $\beta$ -glucuronidase (10000 U/L), xanthine oxidase (1000 U/L), glucose oxidase (1000 U/L),  $Zn^{2+}$  (100  $\mu$ M),  $Fe^{3+}$  (100  $\mu$ M),  $Fe^{2+}$  (100  $\mu$ M), glucose (200  $\mu$ M), and urea (1000  $\mu$ M).

## Cartesian Coordinates

### 1. The global minimum of MPR-AuNC (Isomer A)

Gibbs Free Energies= -3289.715064 a.u

|    |             |             |             |
|----|-------------|-------------|-------------|
| Au | 2.33414900  | -0.49440200 | -1.89385300 |
| Au | -0.20182000 | -0.80674300 | -1.10066300 |
| Au | -2.84218700 | -1.27336300 | -0.58281800 |
| Au | -1.11914800 | -2.79712000 | 0.66844000  |
| Au | 1.19080100  | 1.71499800  | -0.94051100 |
| N  | 2.82417000  | 0.26472900  | 1.73763700  |
| C  | 1.51003700  | 0.30107100  | 2.15843900  |
| N  | 0.94922400  | -0.87366800 | 2.22729000  |
| C  | 1.92629400  | -1.75545400 | 1.80738800  |
| C  | 1.92450300  | -3.15419800 | 1.60358300  |
| N  | 3.10742200  | -3.73889400 | 1.24563600  |
| C  | 4.17141400  | -3.01186100 | 1.02118600  |
| H  | 5.07001700  | -1.15254600 | 0.88622600  |
| N  | 4.21948400  | -1.66540200 | 1.11981400  |
| C  | 3.09435400  | -1.04298900 | 1.52875900  |
| S  | 0.54903500  | -4.17393700 | 1.78719400  |
| H  | 5.09675600  | -3.49084200 | 0.72323000  |
| H  | 1.04439400  | 1.24422800  | 2.41514900  |
| N  | -3.94365100 | 2.53385200  | -0.70669200 |
| C  | -3.05534800 | 2.01266100  | -1.63240700 |
| N  | -1.82555900 | 2.41546100  | -1.46278900 |
| C  | -1.87245200 | 3.25014700  | -0.36836900 |
| C  | -0.87308600 | 3.97748300  | 0.31424200  |
| N  | -1.27332800 | 4.82864100  | 1.30439500  |
| C  | -2.53617300 | 4.91380800  | 1.63430900  |
| H  | -4.49585900 | 4.28712300  | 1.38701300  |
| N  | -3.53038900 | 4.19529600  | 1.07226700  |
| C  | -3.19170400 | 3.34527700  | 0.07774900  |
| S  | 0.81110000  | 3.89381500  | -0.01033900 |
| H  | -2.84121400 | 5.59893200  | 2.41645600  |
| H  | -3.39506000 | 1.36515300  | -2.42580200 |
| C  | -5.27918300 | 0.42667500  | 0.96989800  |
| C  | -5.64005300 | 0.70733800  | -0.48134700 |
| C  | -5.38830900 | 2.22172500  | -0.55346200 |
| C  | -5.91566300 | 1.62084600  | 1.66518800  |
| H  | -4.18338700 | 0.47662600  | 1.07854500  |
| H  | -6.71569300 | 0.55145100  | -0.62176700 |
| H  | -6.97656400 | 1.41935100  | 1.85233900  |
| O  | -5.81600500 | 2.69880600  | 0.69791800  |
| C  | -5.23478900 | 2.04647700  | 2.95046300  |
| H  | -5.65893100 | 3.00022700  | 3.29281600  |
| H  | -4.16118300 | 2.18824100  | 2.76509500  |
| O  | -5.45935000 | 1.00776300  | 3.88555500  |
| H  | -4.97580800 | 1.23388300  | 4.69519300  |
| O  | -5.76855300 | -0.80273400 | 1.44692700  |
| H  | -5.15297300 | -1.48905700 | 1.13356900  |
| O  | -4.89786600 | -0.11412500 | -1.34366800 |
| H  | -5.29065700 | -0.12532300 | -2.23300300 |
| H  | -5.93229300 | 2.73455800  | -1.34625700 |
| C  | 6.11517500  | 1.43602800  | 2.00166000  |
| C  | 4.77759700  | 1.47107000  | 2.75194100  |
| C  | 3.71588000  | 1.40023500  | 1.61257600  |
| C  | 5.73545000  | 1.79026700  | 0.56546000  |
| H  | 6.49271500  | 0.40265800  | 2.03496000  |
| H  | 4.67508700  | 2.42770300  | 3.27315000  |
| H  | 5.71604100  | 2.88308800  | 0.45632000  |
| O  | 4.42055900  | 1.25376000  | 0.39762600  |
| C  | 6.61050000  | 1.16576200  | -0.50149500 |
| H  | 6.20798300  | 1.41013500  | -1.49263900 |
| H  | 6.59323400  | 0.07302500  | -0.38015500 |
| O  | 7.91552900  | 1.68539300  | -0.32734900 |
| H  | 8.47593900  | 1.30339900  | -1.02010200 |
| O  | 7.07342900  | 2.35067500  | 2.48246500  |
| H  | 7.36316000  | 2.04075700  | 3.35546200  |
| O  | 4.71066800  | 0.38531400  | 3.64756700  |
| H  | 3.93370300  | 0.50783400  | 4.21853800  |
| H  | 3.08113500  | 2.29205700  | 1.59519500  |

## 2. Isomer B

Gibbs Free Energies= -3289.692575 a.u

|    |             |             |             |
|----|-------------|-------------|-------------|
| Au | -1.63569300 | -2.66637300 | 0.62204700  |
| Au | -0.06994400 | 1.20349900  | -2.29271800 |
| Au | 0.00676100  | -1.24158300 | -1.47606400 |
| Au | 1.30766600  | -2.47098400 | 0.87532000  |
| Au | 0.07497600  | -4.00411500 | -0.98160500 |
| N  | -6.49612500 | 2.01177600  | 1.42434900  |
| C  | -6.81074100 | 1.11691400  | 2.42827700  |
| N  | -5.99335100 | 0.10440300  | 2.50758300  |
| C  | -5.05944100 | 0.33641900  | 1.51944500  |
| C  | -3.93634700 | -0.40308700 | 1.08922600  |
| N  | -3.19373700 | 0.11440000  | 0.06697000  |
| C  | -3.52765400 | 1.24870000  | -0.49523000 |
| H  | -4.82134000 | 2.85898400  | -0.63367700 |
| N  | -4.59907400 | 1.99126700  | -0.14654900 |
| C  | -5.36077000 | 1.52989500  | 0.86783500  |
| S  | -3.52968800 | -1.89258800 | 1.83178700  |
| N  | 5.79284300  | 2.43618200  | 2.28150700  |
| C  | 5.93023900  | 1.61567400  | 3.38518300  |
| N  | 5.13126100  | 0.58596800  | 3.37958400  |
| C  | 4.43179100  | 0.69770500  | 2.19585500  |
| C  | 3.42823500  | -0.10674800 | 1.61331800  |
| N  | 2.92811600  | 0.28535800  | 0.40453200  |
| C  | 3.37460700  | 1.36545400  | -0.18506700 |
| H  | 4.64230100  | 3.00326200  | -0.19271200 |
| N  | 4.33236200  | 2.17396800  | 0.31463400  |
| C  | 4.86098400  | 1.83062200  | 1.50883700  |
| S  | 2.86745200  | -1.52080600 | 2.40101100  |
| H  | -2.91900600 | 1.64270400  | -1.30387800 |
| H  | -7.67847400 | 1.28425000  | 3.05243100  |
| H  | 6.64270000  | 1.86288800  | 4.16068700  |
| H  | 2.96055300  | 1.65815000  | -1.14456900 |
| C  | 7.65905900  | 3.67598200  | -0.35104000 |
| C  | 7.85960700  | 2.88971900  | 0.94707200  |
| C  | 6.74543800  | 3.45673000  | 1.88201600  |
| C  | 6.91958800  | 4.92345100  | 0.12069300  |
| H  | 6.99783000  | 3.09078000  | -1.00843200 |
| H  | 8.83638200  | 3.13938000  | 1.37250600  |
| H  | 7.64211900  | 5.63423500  | 0.54560000  |
| O  | 6.04641900  | 4.43665000  | 1.14547000  |
| C  | 6.06222000  | 5.61073500  | -0.92093500 |
| H  | 5.49568400  | 6.42153800  | -0.44684800 |
| H  | 5.34762500  | 4.88554200  | -1.33566100 |
| O  | 6.93665500  | 6.10216100  | -1.92013100 |
| H  | 6.39447100  | 6.55812100  | -2.58185100 |
| O  | 8.85862300  | 4.02790000  | -1.00106400 |
| H  | 9.26754200  | 3.20976200  | -1.32734700 |
| O  | 7.74462700  | 1.50873100  | 0.69670700  |
| H  | 8.11152900  | 1.02596100  | 1.45586500  |
| H  | 7.16055900  | 3.87571500  | 2.80245500  |
| C  | -5.85557200 | 5.36764800  | 0.81144000  |
| C  | -6.28004300 | 4.45143500  | 1.96320800  |
| C  | -7.08827600 | 3.32594200  | 1.24593500  |
| C  | -6.85522900 | 5.02469400  | -0.28828500 |
| H  | -4.84739900 | 5.06611900  | 0.48845300  |
| H  | -6.95398500 | 4.99802900  | 2.62990700  |
| H  | -7.79194300 | 5.57106900  | -0.10987700 |
| O  | -7.06746800 | 3.61787600  | -0.13499800 |
| C  | -6.37260100 | 5.26010200  | -1.70490800 |
| H  | -7.11870800 | 4.87650200  | -2.41143100 |
| H  | -5.43317800 | 4.71110900  | -1.86183700 |
| O  | -6.18301300 | 6.65486300  | -1.85446300 |
| H  | -5.91017400 | 6.81434700  | -2.77092900 |
| O  | -5.91309900 | 6.74197200  | 1.11699500  |
| H  | -5.20423800 | 6.93075100  | 1.75270000  |
| O  | -5.14325600 | 3.98378400  | 2.65048300  |
| H  | -5.43179400 | 3.59726300  | 3.49415200  |
| H  | -8.11337800 | 3.26010500  | 1.62063400  |

### 3. Isomer C

Gibbs Free Energies= -3289.685171 a.u

|    |             |             |             |
|----|-------------|-------------|-------------|
| Au | -0.54487500 | -2.81831300 | -0.27420700 |
| Au | 2.05235300  | -2.88060300 | 0.14286100  |
| Au | 1.03787100  | -0.35522600 | -1.16795500 |
| Au | 0.33058500  | 1.77797300  | 0.40139600  |
| Au | 0.68096900  | -0.74037600 | 1.48302300  |
| N  | -6.87285100 | -0.22614400 | -1.02542100 |
| C  | -7.10282800 | -1.56423600 | -1.27891800 |
| N  | -6.03194000 | -2.30483000 | -1.21390600 |
| C  | -5.02328800 | -1.42667000 | -0.87167600 |
| C  | -3.63901300 | -1.61719000 | -0.65008400 |
| N  | -2.90244000 | -0.51287100 | -0.31379700 |
| C  | -3.46515700 | 0.66302600  | -0.20522800 |
| H  | -5.16354200 | 1.84826100  | -0.31018400 |
| N  | -4.77748800 | 0.90917500  | -0.40259600 |
| C  | -5.55280700 | -0.14695100 | -0.73361400 |
| S  | -2.91541400 | -3.15591900 | -0.79102600 |
| C  | -7.86793500 | 2.27813100  | 1.13034700  |
| C  | -8.26668600 | 0.84839000  | 0.75800900  |
| C  | -7.90414300 | 0.76132400  | -0.75814000 |
| C  | -7.91076700 | 2.99622800  | -0.21372500 |
| H  | -6.83128100 | 2.26347800  | 1.50041900  |
| H  | -9.35043000 | 0.73943000  | 0.86639800  |
| H  | -8.95436100 | 3.23735700  | -0.45979400 |
| O  | -7.39955600 | 2.02511000  | -1.13359000 |
| C  | -7.04799000 | 4.23449900  | -0.33529200 |
| H  | -7.07532500 | 4.59052600  | -1.37242300 |
| H  | -6.00843000 | 3.97791200  | -0.08597900 |
| O  | -7.56919500 | 5.19980900  | 0.55960600  |
| H  | -7.05564600 | 6.01322400  | 0.44059500  |
| O  | -8.73878800 | 2.89430300  | 2.05092000  |
| H  | -8.64528800 | 2.42747800  | 2.89705700  |
| O  | -7.57418400 | -0.07454400 | 1.56512900  |
| H  | -8.00604400 | -0.94126900 | 1.48328200  |
| H  | -8.76936200 | 0.48543600  | -1.36660900 |
| H  | -8.10015100 | -1.90885800 | -1.51873400 |
| H  | -2.85796200 | 1.52213500  | 0.06188500  |
| N  | 3.69661100  | 1.93983700  | 1.04346200  |
| C  | 3.68417100  | 1.13492700  | 2.16429300  |
| N  | 3.97731000  | -0.11339400 | 1.92027600  |
| C  | 4.19068700  | -0.16035700 | 0.55654800  |
| C  | 4.46827000  | -1.23563100 | -0.32041800 |
| N  | 4.58939300  | -0.94009200 | -1.65410400 |
| C  | 4.42529000  | 0.28470000  | -2.08349200 |
| H  | 4.01823900  | 2.27823800  | -1.70234300 |
| N  | 4.14268500  | 1.34926800  | -1.30148100 |
| C  | 4.02799900  | 1.11832500  | 0.02349000  |
| S  | 4.61892100  | -2.86570500 | 0.20280800  |
| C  | 4.95794900  | 4.84334000  | -0.32566700 |
| C  | 4.98577000  | 4.08615100  | 1.00405500  |
| C  | 3.59066400  | 3.38695600  | 1.04944800  |
| C  | 3.46569600  | 5.01282300  | -0.58448600 |
| H  | 5.38797000  | 4.19380600  | -1.10380700 |
| H  | 5.04180400  | 4.80848700  | 1.82491300  |
| H  | 3.08914200  | 5.85724100  | 0.00958000  |
| O  | 2.89685900  | 3.78514200  | -0.11501800 |
| C  | 3.06024200  | 5.17258000  | -2.03505600 |
| H  | 1.96524200  | 5.19234900  | -2.10462200 |
| H  | 3.42606100  | 4.31003100  | -2.60998400 |
| O  | 3.63123500  | 6.38208200  | -2.49836100 |
| H  | 3.34264500  | 6.50915800  | -3.41504800 |
| O  | 5.59914200  | 6.09735700  | -0.28462900 |
| H  | 6.55326300  | 5.93516700  | -0.21025000 |
| O  | 6.07323500  | 3.19254600  | 1.02780600  |
| H  | 6.17892600  | 2.86136100  | 1.93535500  |
| H  | 3.02959300  | 3.65213800  | 1.95002800  |
| H  | 3.45946900  | 1.55739000  | 3.13533000  |
| H  | 4.51835500  | 0.49921800  | -3.14215700 |

## 4. Isomer D

Gibbs Free Energies= -3289.668606 a.u

|    |              |             |             |
|----|--------------|-------------|-------------|
| Au | 0.94198900   | -0.89930700 | -1.17468800 |
| Au | -0.66846000  | -0.56941300 | 1.04241600  |
| Au | -1.00997100  | -3.03685400 | -0.46964800 |
| Au | -0.84366000  | 1.21167200  | -1.08685800 |
| Au | 1.17459800   | -2.96261300 | 1.00084200  |
| N  | 4.94874200   | 1.89532000  | 0.49531200  |
| C  | 3.82744800   | 1.25092300  | 0.97463300  |
| N  | 3.27170100   | 0.45339700  | 0.10533000  |
| C  | 4.06952200   | 0.54140600  | -1.01932800 |
| C  | 3.99539500   | -0.07359900 | -2.29348300 |
| N  | 5.00303000   | 0.20381500  | -3.18164400 |
| C  | 5.96439700   | 1.02889300  | -2.86552600 |
| H  | 6.83985900   | 2.31956100  | -1.49803600 |
| N  | 6.07293300   | 1.67388300  | -1.68264200 |
| C  | 5.12404400   | 1.41340400  | -0.75822600 |
| S  | 2.77004700   | -1.14353100 | -2.80753500 |
| C  | 8.29040800   | 2.29689200  | 1.23593400  |
| C  | 7.02821400   | 1.72722800  | 1.88586900  |
| C  | 5.89416400   | 2.63470600  | 1.31625300  |
| C  | 7.87879500   | 3.72830900  | 0.91065100  |
| H  | 8.47312700   | 1.74998700  | 0.29801900  |
| H  | 7.08547600   | 1.87747300  | 2.96846100  |
| H  | 7.94438300   | 4.33947600  | 1.82173200  |
| O  | 6.51243100   | 3.60453400  | 0.49884400  |
| C  | 8.63676700   | 4.39256500  | -0.21942100 |
| H  | 8.18283400   | 5.36757400  | -0.43538100 |
| H  | 8.56074200   | 3.76854400  | -1.12144100 |
| O  | 9.98114700   | 4.52589600  | 0.20312000  |
| H  | 10.46862600  | 4.96404500  | -0.51119900 |
| O  | 9.42296000   | 2.28401900  | 2.07422500  |
| H  | 9.65149600   | 1.35517100  | 2.24139700  |
| O  | 6.88707900   | 0.36484300  | 1.56135300  |
| H  | 6.24825700   | -0.03402000 | 2.17498600  |
| H  | 5.31048500   | 3.10410400  | 2.11293400  |
| H  | 3.47617800   | 1.43460800  | 1.98145200  |
| H  | 6.74945300   | 1.24005000  | -3.58193800 |
| N  | -5.41025000  | 0.71243600  | -0.19970700 |
| C  | -4.82758300  | -0.53830300 | -0.13711100 |
| N  | -3.88807100  | -0.63688600 | 0.76061800  |
| C  | -3.84110400  | 0.60815000  | 1.35906400  |
| C  | -3.02510200  | 1.13881100  | 2.38551800  |
| N  | -3.30265700  | 2.40789300  | 2.81436600  |
| C  | -4.23876600  | 3.11626200  | 2.23692700  |
| H  | -5.70091200  | 3.30301600  | 0.78008800  |
| N  | -5.00172500  | 2.69389600  | 1.20519700  |
| C  | -4.80992000  | 1.42709600  | 0.78261500  |
| S  | -1.73106200  | 0.28294400  | 3.11902200  |
| C  | -8.50195700  | 2.23572900  | 0.07023900  |
| C  | -7.90675800  | 0.82721300  | -0.00086800 |
| C  | -6.64623200  | 1.01762100  | -0.90101000 |
| C  | -7.93635500  | 2.90119700  | -1.17996900 |
| H  | -8.09731300  | 2.73670800  | 0.96304200  |
| H  | -8.60977100  | 0.16632000  | -0.51717800 |
| H  | -8.52866000  | 2.59081500  | -2.05227000 |
| O  | -6.60728100  | 2.37759900  | -1.27491800 |
| C  | -7.82726600  | 4.41091300  | -1.13518600 |
| H  | -7.31445200  | 4.76229000  | -2.03890900 |
| H  | -7.22825500  | 4.70395500  | -0.26124000 |
| O  | -9.14515700  | 4.92134300  | -1.05130800 |
| H  | -9.08409200  | 5.88878500  | -1.05486200 |
| O  | -9.91050700  | 2.26513900  | 0.05159100  |
| H  | -10.22255300 | 1.88513600  | 0.88877700  |
| O  | -7.61552100  | 0.35751600  | 1.29414500  |
| H  | -7.47451600  | -0.60276900 | 1.24905200  |
| H  | -6.67371300  | 0.36831400  | -1.78008600 |
| H  | -5.15326800  | -1.32536800 | -0.80438600 |
| H  | -4.43808300  | 4.12446800  | 2.58051400  |



## 5. Isomer E

Gibbs Free Energies= -3289.661316 a.u

|    |             |             |             |
|----|-------------|-------------|-------------|
| Au | 2.02510700  | -1.35326700 | -0.29674900 |
| Au | 4.86871100  | -1.52559300 | 0.16864000  |
| Au | 3.96520900  | 0.87600500  | 0.36978200  |
| Au | -0.26984000 | -2.21491900 | -1.09637100 |
| Au | 2.54884300  | 3.00150700  | -1.46986200 |
| N  | -6.86199900 | -1.10632800 | -1.16725300 |
| C  | -6.79938900 | -2.43429100 | -0.78623100 |
| N  | -5.63447000 | -2.98466600 | -0.98260600 |
| C  | -4.85305500 | -1.97107500 | -1.50199300 |
| C  | -3.48615600 | -1.92312300 | -1.86624600 |
| N  | -3.01194400 | -0.72935700 | -2.35165000 |
| C  | -3.78968200 | 0.31943900  | -2.42842100 |
| H  | -5.64875600 | 1.19340200  | -2.14532800 |
| N  | -5.09001100 | 0.34395500  | -2.06698500 |
| C  | -5.61250800 | -0.80867500 | -1.59621100 |
| S  | -2.45303100 | -3.26953400 | -1.70991500 |
| N  | -1.27294900 | 0.78984200  | 0.97185500  |
| C  | -0.84252800 | 1.10447600  | -0.30252400 |
| N  | 0.24684300  | 1.82260100  | -0.32362700 |
| C  | 0.59268700  | 1.97877000  | 1.00057100  |
| C  | 1.68989600  | 2.57073200  | 1.64278900  |
| N  | 1.72921200  | 2.59237900  | 2.99475800  |
| C  | 0.77266500  | 2.02237800  | 3.68865800  |
| H  | -0.97127300 | 0.92188600  | 3.74209400  |
| N  | -0.27687300 | 1.37502900  | 3.14434900  |
| C  | -0.35846100 | 1.33949700  | 1.80224300  |
| S  | 3.07908100  | 3.25577200  | 0.82761300  |
| H  | -3.39563300 | 1.25379200  | -2.81225000 |
| H  | -7.67391800 | -2.92549900 | -0.38072200 |
| H  | -1.40461100 | 0.77942600  | -1.16810100 |
| H  | 0.80238600  | 2.04643800  | 4.77107300  |
| C  | -7.43976600 | 1.99713700  | 0.25555400  |
| C  | -7.54005000 | 0.51254200  | 0.61631100  |
| C  | -7.88681700 | -0.16627900 | -0.74803600 |
| C  | -8.25259700 | 2.08487000  | -1.03330900 |
| H  | -6.38522800 | 2.22561300  | 0.03578600  |
| H  | -8.37534200 | 0.36290100  | 1.30720900  |
| H  | -9.32180500 | 2.12473700  | -0.78201200 |
| O  | -7.95209700 | 0.86123500  | -1.71341700 |
| C  | -7.89208100 | 3.22374700  | -1.96424100 |
| H  | -8.46215300 | 3.12408400  | -2.89592900 |
| H  | -6.82096000 | 3.16557000  | -2.20632600 |
| O  | -8.20336200 | 4.42833500  | -1.28941800 |
| H  | -8.00235600 | 5.15931500  | -1.89351100 |
| O  | -7.96650700 | 2.86407300  | 1.23314900  |
| H  | -7.40382500 | 2.79183800  | 2.02126900  |
| O  | -6.32528700 | 0.06905500  | 1.17644500  |
| H  | -6.47465300 | -0.80134800 | 1.58218300  |
| H  | -8.82720700 | -0.72158100 | -0.69726200 |
| C  | -2.63700300 | -1.55689400 | 3.26477100  |
| C  | -1.88244300 | -1.45372700 | 1.92847300  |
| C  | -2.36874300 | -0.09258300 | 1.33876800  |
| C  | -3.66800900 | -0.43149800 | 3.20607300  |
| H  | -1.91638600 | -1.35653300 | 4.07120800  |
| H  | -2.19483300 | -2.25952400 | 1.25538900  |
| H  | -4.59280000 | -0.82601400 | 2.76693700  |
| O  | -3.09859600 | 0.56099500  | 2.35310300  |
| C  | -3.95234100 | 0.23512900  | 4.53560800  |
| H  | -4.67146000 | 1.05101300  | 4.39080200  |
| H  | -3.01556900 | 0.66303600  | 4.92078500  |
| O  | -4.46162700 | -0.76315100 | 5.40035300  |
| H  | -4.63684100 | -0.34565200 | 6.25766000  |
| O  | -3.30268600 | -2.78404300 | 3.46414800  |
| H  | -2.62788700 | -3.46932100 | 3.59507700  |
| O  | -0.49631000 | -1.49319900 | 2.17764100  |
| H  | -0.02693400 | -1.59355800 | 1.31935100  |
| H  | -2.97777600 | -0.23288700 | 0.43807900  |

6. The global minimum of MP-AuNC  
 Gibbs Free Energies= -2297.964114 a.u

|    |             |             |             |
|----|-------------|-------------|-------------|
| Au | -1.39152100 | -2.03863600 | -1.35101600 |
| Au | -0.11248200 | 0.27665700  | -0.90611800 |
| Au | 0.99584400  | 2.72653400  | -0.60715600 |
| Au | -1.38373200 | 2.42077600  | 0.49510700  |
| Au | 0.95884700  | -2.29624200 | -0.14552700 |
| N  | -1.78139700 | -2.49013500 | 2.27440100  |
| C  | -0.90443400 | -1.47623600 | 2.58776300  |
| N  | -1.39214700 | -0.28317600 | 2.37257900  |
| C  | -2.65652500 | -0.50457900 | 1.86035700  |
| C  | -3.68842700 | 0.36438800  | 1.43847200  |
| N  | -4.87597200 | -0.20206600 | 1.06251400  |
| C  | -5.02319800 | -1.50316600 | 1.04340300  |
| H  | -4.24319300 | -3.39135400 | 1.34013200  |
| N  | -4.06364000 | -2.38895500 | 1.38632400  |
| C  | -2.88773000 | -1.88120000 | 1.80749900  |
| S  | -3.58965700 | 2.08352300  | 1.40254000  |
| H  | -5.96797500 | -1.93262800 | 0.73193600  |
| H  | 0.07199000  | -1.69627500 | 2.99603300  |
| N  | 4.47074400  | 1.59494600  | -0.23903400 |
| C  | 3.66764800  | 0.98934400  | -1.18010300 |
| N  | 3.30583600  | -0.22197200 | -0.84737900 |
| C  | 3.87812900  | -0.43656400 | 0.38988600  |
| C  | 3.83910300  | -1.52695200 | 1.28867600  |
| N  | 4.61936800  | -1.44721600 | 2.41056000  |
| C  | 5.31030800  | -0.36636500 | 2.67141500  |
| H  | 5.87300600  | 1.55548500  | 2.16878400  |
| N  | 5.32665700  | 0.73939000  | 1.89596500  |
| C  | 4.61442000  | 0.69225700  | 0.75154700  |
| S  | 2.91563400  | -2.95858400 | 1.08130100  |
| H  | 5.91679800  | -0.31908700 | 3.56812600  |
| H  | 3.41160000  | 1.49771300  | -2.09967000 |
| H  | -1.60369100 | -3.48801300 | 2.34213800  |
| H  | 4.87442400  | 2.52579100  | -0.29188000 |

## References

- [1] Zhao, Y.; Truhlar, D. *Theor. Chem. Acc.*, 2008, **120**, 215-241.
- [2] A. V. Marenich, C. J. Cramer, D. G. Truhlar, *J. Phys. Chem. B.*, 2009, **113**, 6378-6396.
- [3] A. E. Reed, R. B. Weinstock, F. Weinhold, *J. Chem. Phys.*, 1985, **83**, 735-746.
- [4] M. J. Frisch, G. W. Trucks, H. B. Schlegel, G. E. Scuseria, M. A. Robb, J. R. Cheeseman, G. Scalmani, V. Barone, B. Mennucci, G. A. Petersson, H. Nakatsuji, M. Caricato, X. Li, H. P. Hratchian, A. F. Izmaylov, G. Z. J. Bloino, J. L. Sonnenberg, M. Hada, M. Ehara, K. Toyota, R. Fukuda, J. Hasegawa, M. Ishida, T. Nakajima, Y. Honda, O. Kitao, H. Nakai, T. Vreven, J. A. Montgomery, J. E. Peralta, F. Ogliaro, M. Bearpark, J. J. Heyd, E. Brothers, K. N. Kudin, V. N. Staroverov, T. Keith, R. Kobayashi, J. Normand, K. Raghavachari, A. Rendell, J. C. Burant, S. S. Iyengar, J. Tomasi, M. Cossi, N. Rega, J. M. Millam, M. Klene, J. E. Knox, J. B. Cross, V. Bakken, C. Adamo, J. Jaramillo, R. Gomperts, R. E. Stratmann, O. Yazyev, A. J. Austin, R. Cammi, C. Pomelli, J. W. Ochterski, R. L. Martin, K. Morokuma, V. G. Zakrzewski, G. A. Voth, P. Salvador, J. J. Dannenberg, S. Dapprich, A. D. Daniels, O. Farkas, J. B. Foresman, J. V. Ortiz, J. Cioslowski, D. J. Fox, Gaussian 09, Revision D.01, Gaussian, Inc., Wallingford CT, 2013.
- [5] R. Dennington, T. Keith, J. Millam, GAUSSVIEW, Version 5, Semichem Inc., Shawnee Mission, KS, 2009.
- [6] T. Lu, F. Chen, *J. Comput. Chem.*, 2012, **33**, 580-592.
